# Supplementary material for: Ubiquitin carboxyl-terminal esterase L1 (UCHL1) is associated with stem-like cancer cell functions in pediatric high-grade glioma
Source: PubMed Central journal article supplement (PMC5417601; doi:10.1371/journal.pone.0176879), 2017-05-04
Supplement: pone.0176879.s003.pdf [file pone.0176879.s003.pdf]

# INGENUITY<sup>®</sup>

## PATHWAY ANALYSIS

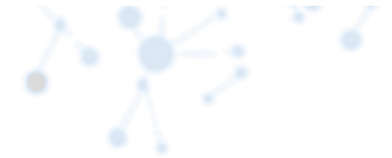

Analysis Name: SJGBM2. Ctrl\_vs\_UCHL1\_KD\_result\_DEseq\_filtered\_by pvalue - 2016-07-21 04:32 PM  
Analysis Creation Date: 2016-07-21  
Build version: 389077M  
Content version: 27821452 (Release Date: 2016-06-14)

### Analysis Settings

Reference set: Ingenuity Knowledge Base (Genes Only)  
Relationship to include: Direct and Indirect  
Does not Include Endogenous Chemicals  
Optional Analyses: My Pathways My List

#### Filter Summary:

Consider only relationships where  
confidence = Experimentally Observed OR High (predicted)

**Top Canonical Pathways**

| Name                                                                           | p-value  | Overlap      |
|--------------------------------------------------------------------------------|----------|--------------|
| Role of Macrophages, Fibroblasts and Endothelial Cells in Rheumatoid Arthritis | 3.68E-05 | 4.9 % 15/309 |
| Clathrin-mediated Endocytosis Signaling                                        | 5.14E-04 | 5.1 % 10/197 |
| Virus Entry via Endocytic Pathways                                             | 6.15E-04 | 6.9 % 7/102  |
| HMGB1 Signaling                                                                | 6.15E-04 | 6.0 % 8/133  |
| Colorectal Cancer Metastasis Signaling                                         | 8.18E-04 | 4.5 % 11/247 |

**Top Upstream Regulators**

| Upstream Regulator | p-value of overlap | Predicted Activation |
|--------------------|--------------------|----------------------|
| FGF2               | 3.57E-18           |                      |
| IL1B               | 7.67E-18           | Activated            |
| TNF                | 1.04E-16           | Activated            |
| PDGF BB            | 1.95E-16           |                      |
| dexamethasone      | 3.82E-16           |                      |

**Top Diseases and Bio Functions****Diseases and Disorders**

| Name                                | p-value             | #Molecules |
|-------------------------------------|---------------------|------------|
| Cancer                              | 1.29E-04 - 5.38E-14 | 285        |
| Organismal Injury and Abnormalities | 1.29E-04 - 5.38E-14 | 287        |
| Cardiovascular Disease              | 1.08E-04 - 3.30E-12 | 73         |
| Neurological Disease                | 1.22E-04 - 3.41E-12 | 126        |
| Gastrointestinal Disease            | 1.29E-04 - 1.11E-11 | 256        |

**Molecular and Cellular Functions**

| Name                              | p-value             | #Molecules |
|-----------------------------------|---------------------|------------|
| Cellular Growth and Proliferation | 1.17E-04 - 5.84E-22 | 175        |
| Cellular Development              | 1.43E-04 - 5.63E-19 | 154        |
| Cellular Movement                 | 1.24E-04 - 7.92E-16 | 108        |
| Cell Death and Survival           | 1.31E-04 - 6.47E-15 | 128        |
| Cell Morphology                   | 1.22E-04 - 2.07E-14 | 118        |

### Physiological System Development and Function

| Name                                           | p-value             | #Molecules |
|------------------------------------------------|---------------------|------------|
| Organismal Survival                            | 1.76E-06 - 1.38E-15 | 110        |
| Connective Tissue Development and Function     | 9.46E-05 - 3.02E-15 | 93         |
| Tissue Development                             | 1.43E-04 - 3.02E-15 | 160        |
| Cardiovascular System Development and Function | 1.15E-04 - 4.83E-15 | 87         |
| Organismal Development                         | 1.41E-04 - 2.90E-14 | 153        |

### Top Tox Functions

#### Assays: Clinical Chemistry and Hematology

| Name                                     | p-value             | #Molecules |
|------------------------------------------|---------------------|------------|
| Increased Levels of Albumin              | 1.08E-01 - 1.41E-02 | 3          |
| Increased Levels of Alkaline Phosphatase | 1.90E-02 - 1.41E-02 | 5          |
| Increased Levels of Red Blood Cells      | 5.50E-02 - 5.50E-02 | 4          |
| Decreased Levels of Albumin              | 1.69E-01 - 6.87E-02 | 2          |
| Decreased Levels of Hematocrit           | 1.20E-01 - 1.20E-01 | 1          |

### Cardiotoxicity

| Name                        | p-value             | #Molecules |
|-----------------------------|---------------------|------------|
| Cardiac Infarction          | 1.57E-01 - 6.60E-06 | 16         |
| Cardiac Hypertrophy         | 3.49E-01 - 3.18E-05 | 18         |
| Cardiac Arteriopathy        | 1.08E-01 - 1.08E-04 | 15         |
| Cardiac Necrosis/Cell Death | 3.75E-01 - 2.26E-04 | 12         |
| Cardiac Damage              | 1.14E-01 - 3.11E-04 | 6          |

### Hepatotoxicity

| Name                                 | p-value             | #Molecules |
|--------------------------------------|---------------------|------------|
| Liver Proliferation                  | 5.09E-01 - 5.64E-05 | 12         |
| Liver Hyperplasia/Hyperproliferation | 5.09E-01 - 3.68E-04 | 119        |
| Liver Damage                         | 6.04E-01 - 7.10E-04 | 14         |
| Liver Necrosis/Cell Death            | 2.58E-01 - 8.10E-04 | 12         |
| Liver Fibrosis                       | 5.09E-01 - 9.45E-04 | 10         |

### Nephrotoxicity

| Name               | p-value             | #Molecules |
|--------------------|---------------------|------------|
| Kidney Failure     | 2.58E-01 - 1.09E-04 | 13         |
| Renal Inflammation | 1.99E-01 - 5.91E-04 | 8          |
| Renal Nephritis    | 1.99E-01 - 5.91E-04 | 8          |
| Renal Damage       | 1.92E-01 - 8.00E-04 | 11         |
| Glomerular Injury  | 1.92E-01 - 3.52E-03 | 9          |

### Top Regulator Effect Networks

| ID | Regulators                        | Diseases & Functions                 | Consistency Score |
|----|-----------------------------------|--------------------------------------|-------------------|
| 1  | DICER1,EBF1,ERBB4,MAP3K8,NFATC2   | development of lymphocytes (+2 more) | 7.75              |
| 2  | F2,IL10RA,ITGB1,NEDD9,NEUROG1,SP1 | microtubule dynamics                 | 5.578             |

|   |                          |                                |       |
|---|--------------------------|--------------------------------|-------|
| 3 | ERBB4,IL3,TP53           | fibrosis of liver              | 3.402 |
| 4 | CNTF,MAP3K8,MAPK9,NFATC2 | differentiation of lymphocytes | 3.333 |
| 5 | INHA,SP3                 | mitogenesis                    | 2.236 |

### Top Networks

| ID | Associated Network Functions                                                                   | Score |
|----|------------------------------------------------------------------------------------------------|-------|
| 1  | Endocrine System Disorders, Immunological Disease, Inflammatory Disease                        | 42    |
| 2  | Cell Death and Survival, Lipid Metabolism, Molecular Transport                                 | 35    |
| 3  | Cellular Growth and Proliferation, Immunological Disease, Inflammatory Disease                 | 33    |
| 4  | Digestive System Development and Function, Embryonic Development, Organ Development            | 33    |
| 5  | Digestive System Development and Function, Connective Tissue Disorders, Developmental Disorder | 28    |

### Top Tox Lists

| Name                                            | p-value  | Overlap      |
|-------------------------------------------------|----------|--------------|
| <a href="#">Acute Renal Failure Panel (Rat)</a> | 2.52E-06 | 12.9 % 8/62  |
| <a href="#">Cardiac Hypertrophy</a>             | 5.16E-05 | 4.1 % 18/435 |
| <a href="#">Liver Proliferation</a>             | 1.03E-04 | 5.3 % 12/228 |
| <a href="#">Cardiac Necrosis/Cell Death</a>     | 5.38E-04 | 4.4 % 12/273 |
| <a href="#">Liver Necrosis/Cell Death</a>       | 8.86E-04 | 4.2 % 12/289 |

### Top My Lists

| Name                                 | p-value  | Overlap       |
|--------------------------------------|----------|---------------|
| <a href="#">CFC_MMS_YO_Cancer</a>    | 2.66E-09 | 12.5 % 13/104 |
| <a href="#">Inflammation</a>         | 5.52E-09 | 3.3 % 53/1608 |
| <a href="#">MRU_MMS_YO_cancer</a>    | 1.90E-05 | 11.9 % 7/59   |
| <a href="#">Oxidative Metabolism</a> | 1.73E-02 | 3.5 % 8/231   |
| <a href="#">Mitochondria</a>         | 1.84E-02 | 2.7 % 13/476  |

## Top My Pathways

| Name               | p-value  | Overlap     |
|--------------------|----------|-------------|
| let-7              | 1.23E-02 | 3.7 % 8/217 |
| mTOR Signaling     | 2.33E-02 | 3.5 % 7/199 |
| TGF- Signaling     | 1.25E-01 | 3.4 % 3/87  |
| ERK/MAPK Signaling | 1.52E-01 | 2.5 % 5/199 |
| p38 MAPK Signaling | 2.29E-01 | 2.6 % 3/117 |

## Top Analysis-Ready Molecules

## Exp Log Ratio up-regulated

| Molecules       | Exp. Value | Exp. Chart |
|-----------------|------------|------------|
| <b>SERPINB4</b> | ↑ 5.957    |            |
| <b>TAC1</b>     | ↑ 5.432    |            |
| <b>FGF21</b>    | ↑ 4.622    |            |
| <b>ANKRD1</b>   | ↑ 4.197    |            |
| <b>ENPP2</b>    | ↑ 4.137    |            |
| <b>SBSN</b>     | ↑ 4.054    |            |
| <b>GDF15</b>    | ↑ 3.737    |            |
| <b>MEIOB</b>    | ↑ 3.703    |            |
| <b>NGFR</b>     | ↑ 3.643    |            |
| <b>MT1G</b>     | ↑ 3.566    |            |

## Exp Log Ratio down-regulated

| Molecules          | Exp. Value | Exp. Chart |
|--------------------|------------|------------|
| <b>IGLL1/IGLL5</b> | ↓ -5.329   |            |
| <b>AQP4</b>        | ↓ -5.213   |            |
| <b>ABCA4</b>       | ↓ -4.766   |            |

|               |          |
|---------------|----------|
| <b>GRAP2</b>  | ↓ -4.748 |
| <b>FAM83F</b> | ↓ -4.457 |
| <b>SP7</b>    | ↓ -4.239 |
| <b>CALB1</b>  | ↓ -4.188 |
| <b>PTPN22</b> | ↓ -3.940 |
| <b>TAC3</b>   | ↓ -3.854 |
| <b>PDE7B</b>  | ↓ -3.764 |
